# Supplementary material for: Pragmatic Sensory Screening in Anorexia Nervosa and Associations with Autistic Traits
Source: MDPI journal article supplement (doi:10.3390/jcm9041182), 2020-04-20
Supplement: s1 [file s1]

## Sensory Summary

Mark where you think you are on the below scales. Hypersensitivity means you are highly sensitive to sensations and may try and avoid them where possible; hyposensitivity means you have lower sensitivity and may try to seek out these sensations. There are examples below each scale. If you think you are neither hyper/hyposensitive and have no sensory differences, mark yourself in the middle as a 5.

### Taste

|   |   |   |   |   |   |   |   |   |   |    |
|---|---|---|---|---|---|---|---|---|---|----|
| 0 | 1 | 2 | 3 | 4 | 5 | 6 | 7 | 8 | 9 | 10 |
|---|---|---|---|---|---|---|---|---|---|----|

(Hyposensitive)

(No sensory differences)

(Hypersensitive)

If I am hyposensitive, I might add lots of salt to my food to make it taste stronger. If I am hypersensitive, I might prefer to eat bland foods as I find them too strong.

### Smell

|   |   |   |   |   |   |   |   |   |   |    |
|---|---|---|---|---|---|---|---|---|---|----|
| 0 | 1 | 2 | 3 | 4 | 5 | 6 | 7 | 8 | 9 | 10 |
|---|---|---|---|---|---|---|---|---|---|----|

(Hyposensitive)

(No sensory differences)

(Hypersensitive)

If I am hyposensitive, I might not notice strong smells and enjoy smelling essential oils. If I am hypersensitive, I might dislike smelly places like a canteen and find smells overpowering.

### Vision

|   |   |   |   |   |   |   |   |   |   |    |
|---|---|---|---|---|---|---|---|---|---|----|
| 0 | 1 | 2 | 3 | 4 | 5 | 6 | 7 | 8 | 9 | 10 |
|---|---|---|---|---|---|---|---|---|---|----|

(Hyposensitive)

(No sensory differences)

(Hypersensitive)

If I am hyposensitive, I might really like watching bright light displays. If I am hypersensitive, I might prefer to have lights dimmed or turned off.

### Sound

|   |   |   |   |   |   |   |   |   |   |    |
|---|---|---|---|---|---|---|---|---|---|----|
| 0 | 1 | 2 | 3 | 4 | 5 | 6 | 7 | 8 | 9 | 10 |
|---|---|---|---|---|---|---|---|---|---|----|

(Hyposensitive)

(No sensory differences)

(Hypersensitive)

If I am hyposensitive, I might turn my music up loud and dislike silence. If I am hypersensitive, I might dislike loud spaces and put my hands over my ears.

### Touch

|   |   |   |   |   |   |   |   |   |   |    |
|---|---|---|---|---|---|---|---|---|---|----|
| 0 | 1 | 2 | 3 | 4 | 5 | 6 | 7 | 8 | 9 | 10 |
|---|---|---|---|---|---|---|---|---|---|----|

(Hyposensitive)

(No sensory differences)

(Hypersensitive)

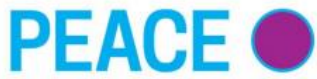

Pathway for Eating disorders and Autism  
developed from Clinical Experience

If I am hyposensitive, I might enjoy rubbing my hands on soft fabric or a soft toy. If I am hypersensitive, I might dislike and avoid touching certain fabrics.

## Texture

|   |   |   |   |   |   |   |   |   |   |    |
|---|---|---|---|---|---|---|---|---|---|----|
| 0 | 1 | 2 | 3 | 4 | 5 | 6 | 7 | 8 | 9 | 10 |
|---|---|---|---|---|---|---|---|---|---|----|

(Hyposensitive)

(No sensory  
differences)

(Hypersensitive)

If I am hyposensitive, I might really enjoy the feeling of certain food textures in my mouth (such as liking crunchy food). If I am hypersensitive, I might strongly dislike and avoid eating certain food textures (such as mashed potato).
